# Supplementary material for: Biological Activity of NHC-Gold-Alkynyl Complexes Derived from 3-Hydroxyflavones
Source: MDPI journal article supplement (doi:10.3390/pharmaceutics14102064), 2022-09-27

# Biological Activity of NHC-Gold-Alkyne Complexes Derived from 3-hydroxyflavones

Inés Mármol <sup>1,2</sup>, Javier Quero <sup>2</sup>, Paula Azcárate <sup>1</sup>, Elena Atrián-Blasco <sup>3</sup>, Carla Ramos <sup>4</sup>, Joana Santos <sup>4</sup>, María Concepción Gimeno <sup>1</sup>, María Jesús Rodríguez-Yoldi <sup>2,\*</sup> and Elena Cerrada <sup>1,\*</sup>

<sup>1</sup> Departamento de Química Inorgánica, Instituto de Síntesis Química y Catálisis Homogénea-ISQCH, Universidad de Zaragoza-C.S.I.C., Pedro Cerbuna 12, 50009 Zaragoza, Spain

<sup>2</sup> Departamento de Farmacología y Fisiología, Medicina Legal y Forense, Unidad de Fisiología, Universidad de Zaragoza, CIBERobn, IIS Aragón, IA2, 50013 Zaragoza, Spain

<sup>3</sup> Instituto de Nanociencia y Materiales de Aragón (INMA), CSIC-Universidad de Zaragoza, 50009 Zaragoza, Spain

<sup>4</sup> Escola Superior de Tecnologia e Gestão, Instituto Politécnico de Viana do Castelo, Avenida do Atlântico No. 644, 4900-348 Viana do Castelo, Portugal

\* Correspondence: mjrodyol@unizar.es (M.J.R.-Y.); ecerrada@unizar.es (E.C.)

Table of contents:

**Figures S1–S16.** <sup>1</sup>H NMR and <sup>13</sup>C{<sup>1</sup>H} NMR spectra

**Figure S17.** UV-Vis spectra of gold complexes recorded at different times under physiological conditions.

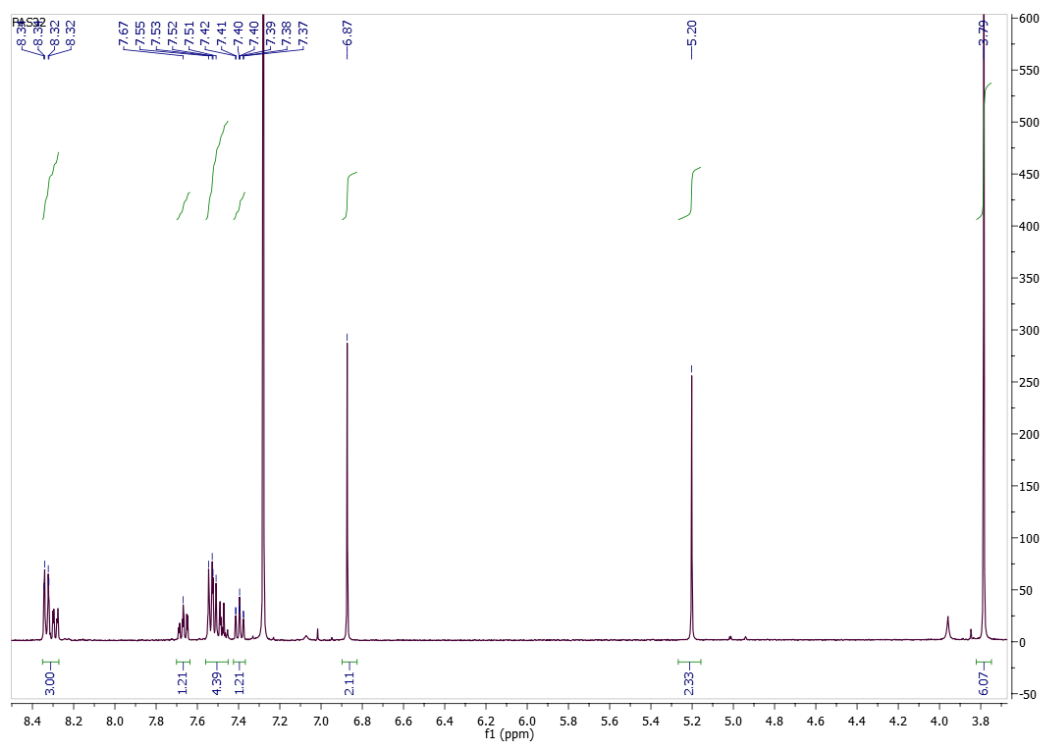

**Figure S1.**  $^1H$  NMR spectrum of  $[Au(La)(lMe)]$  (R = H) (**1**) in  $CDCl_3$

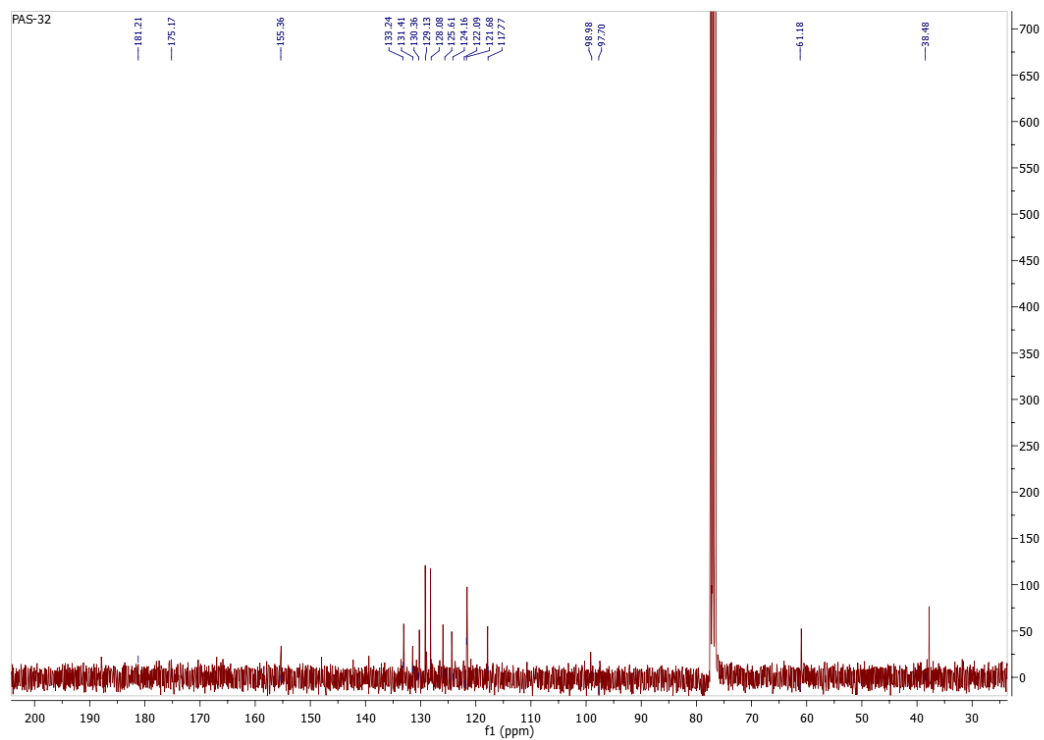

**Figure S2.**  $^{13}C\{^1H\}$  NMR spectrum of  $[Au(La)(lMe)]$  (R = H) (**1**) in  $CDCl_3$

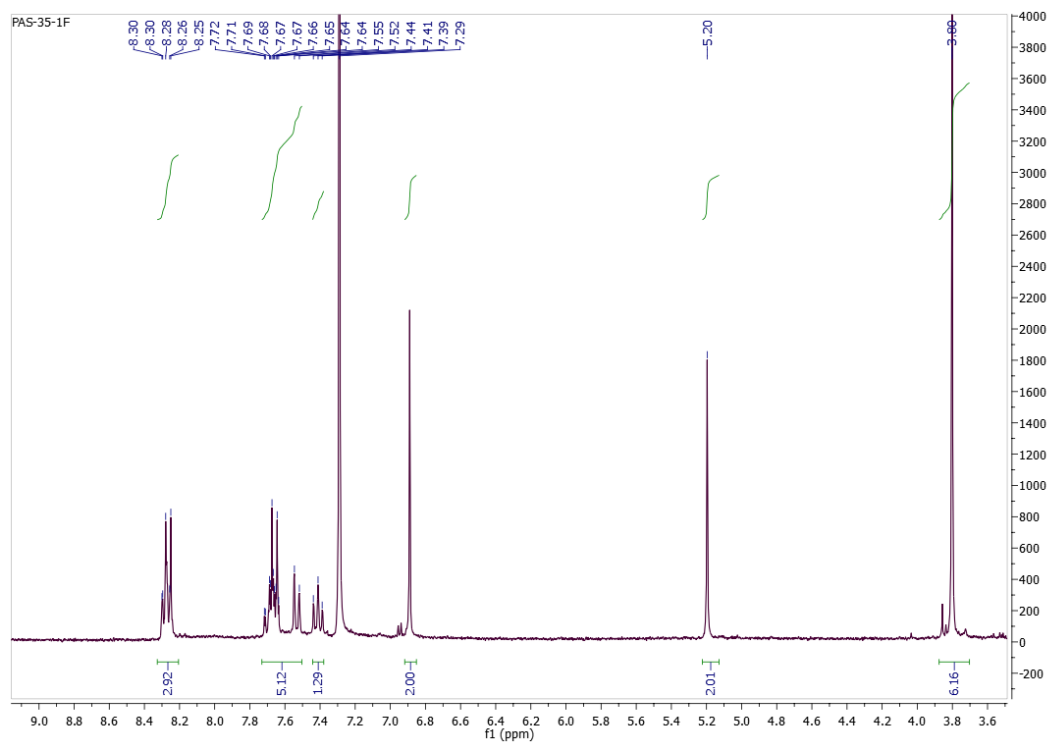

Figure S3.  $^1H$  NMR spectrum of  $[Au(Lb)(lMe)]$  (R = Br) (**2**) in  $CDCl_3$

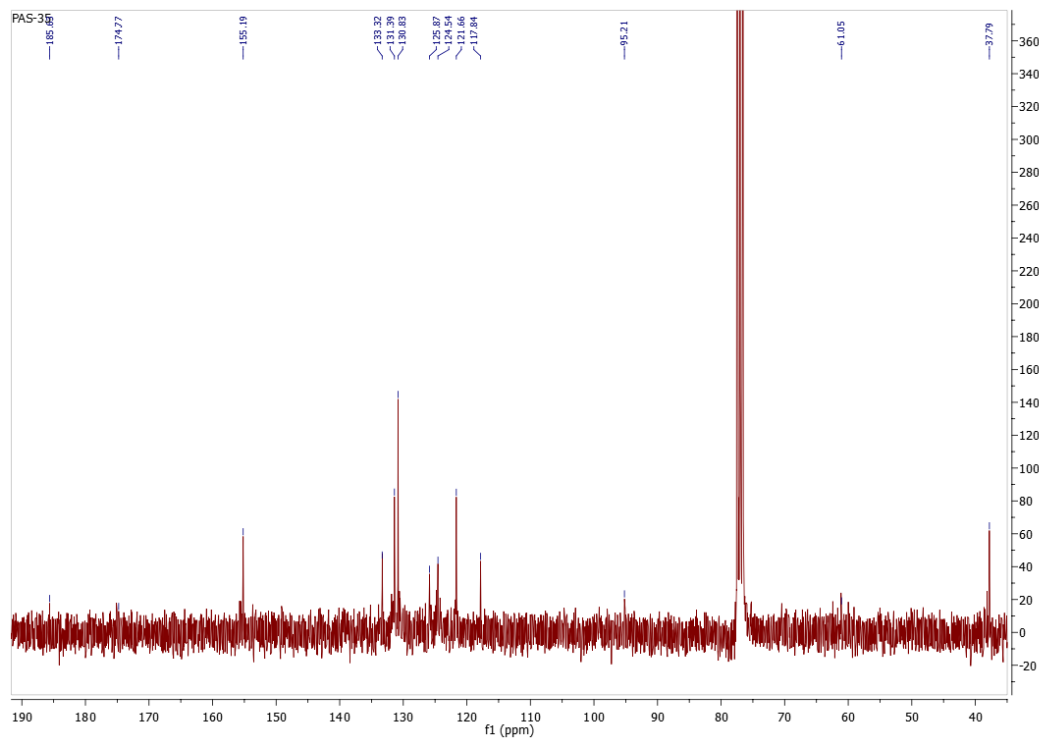

Figure S4.  $^{13}C\{^1H\}$  NMR spectrum of  $[Au(Lb)(lMe)]$  (R = Br) (**2**) in  $CDCl_3$

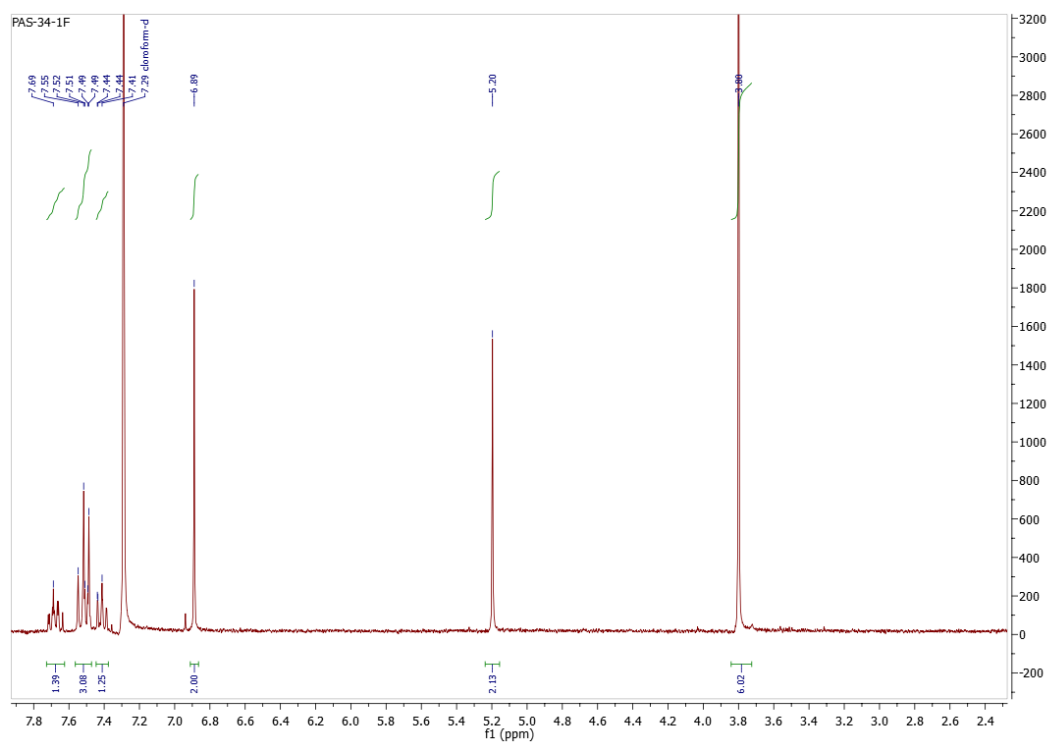

Figure S5.  $^1\text{H}$  NMR spectrum of  $[\text{Au}(\text{Lc})(\text{lMe})]$  ( $\text{R} = \text{Cl}$ ) (**3**) in  $\text{CDCl}_3$

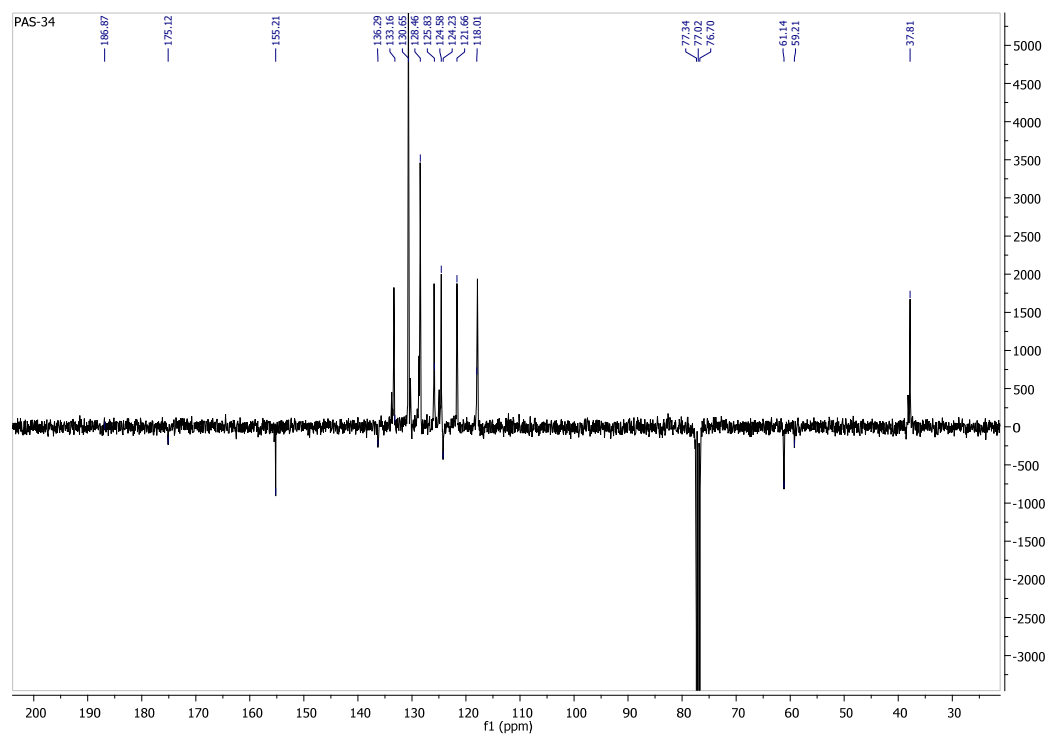

Figure S6.  $^{13}\text{C}\{^1\text{H}\}$ -APT NMR spectrum of  $[\text{Au}(\text{Lc})(\text{lMe})]$  ( $\text{R} = \text{Cl}$ ) (**3**) in  $\text{CDCl}_3$

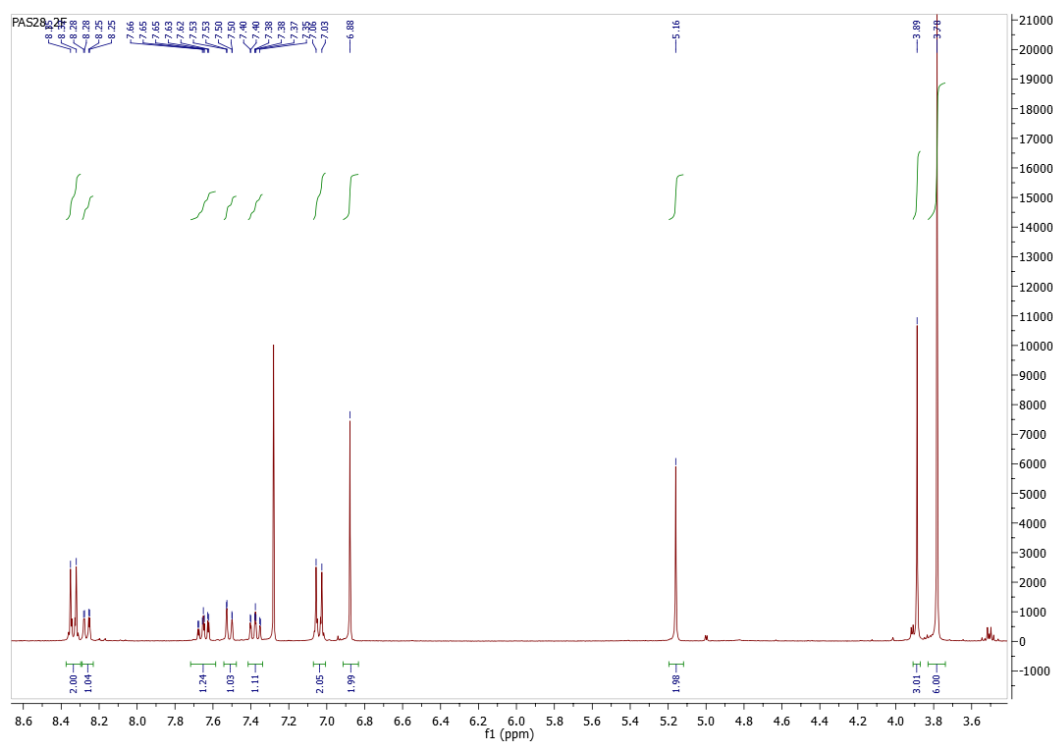

Figure S7.  $^1\text{H}$  NMR spectrum of  $[\text{Au}(\text{Ld})(\text{IMe})]$  ( $\text{R} = \text{OMe}$ ) (**4**) in  $\text{CDCl}_3$

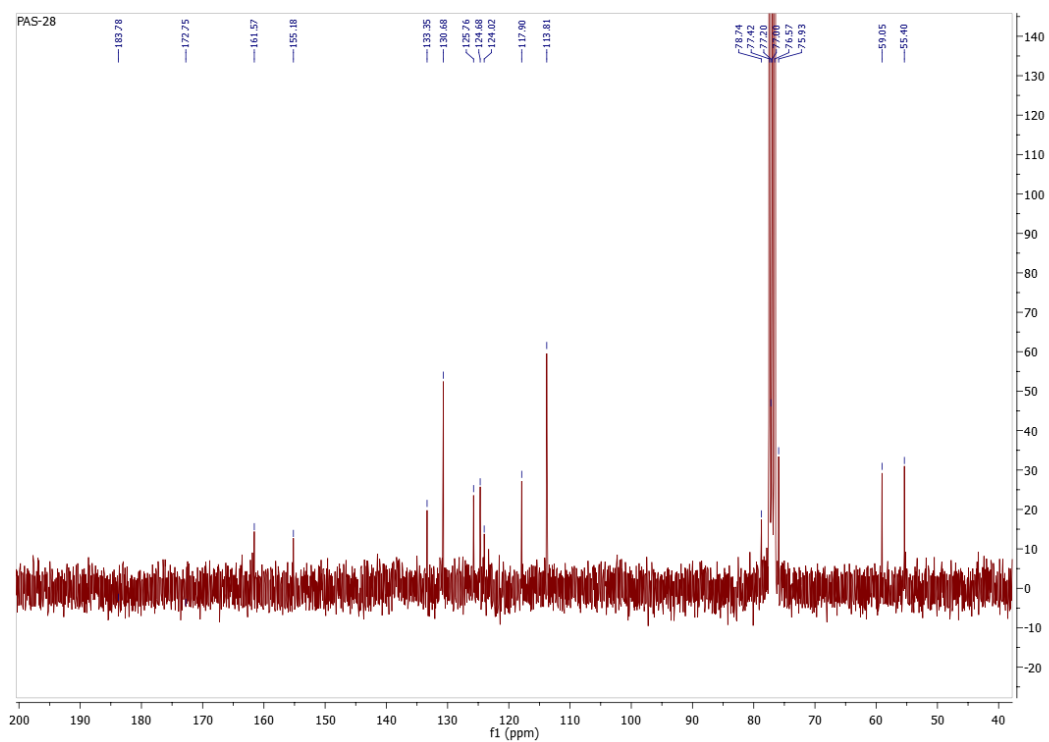

Figure S8.  $^{13}\text{C}\{^1\text{H}\}$  NMR spectrum of  $[\text{Au}(\text{Ld})(\text{IMe})]$  ( $\text{R} = \text{OMe}$ ) (**4**) in  $\text{CDCl}_3$

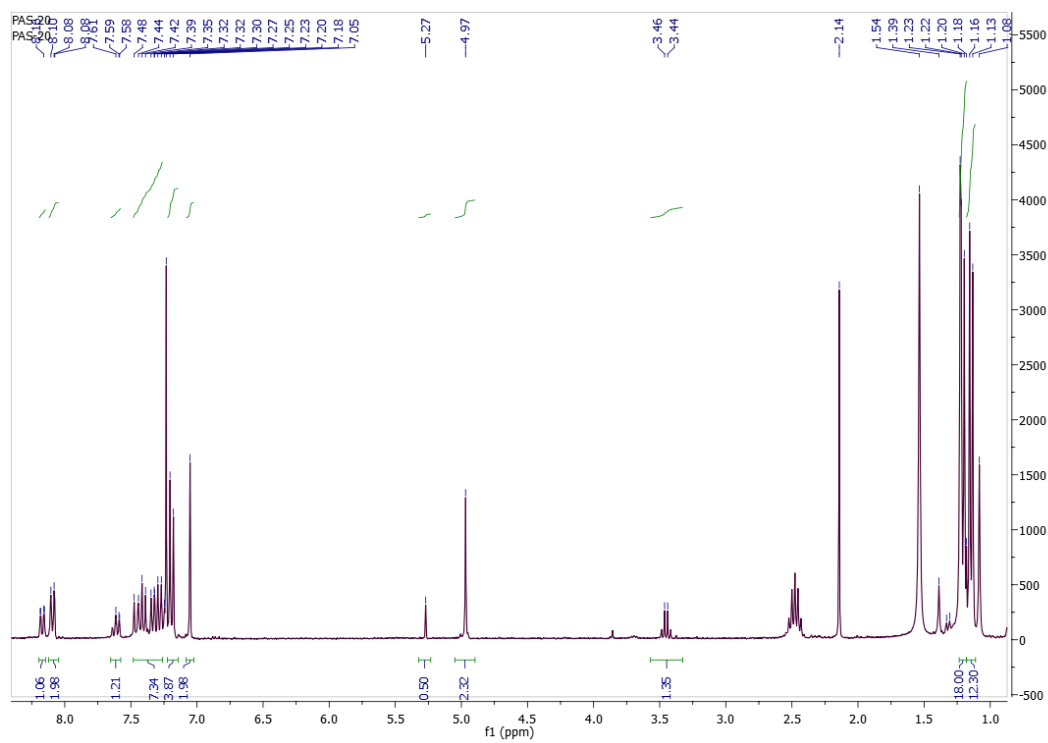

Figure S9.  $^1H$  NMR spectrum of  $[Au(La)(IPr)]$  (R = H) (5) in  $CDCl_3$

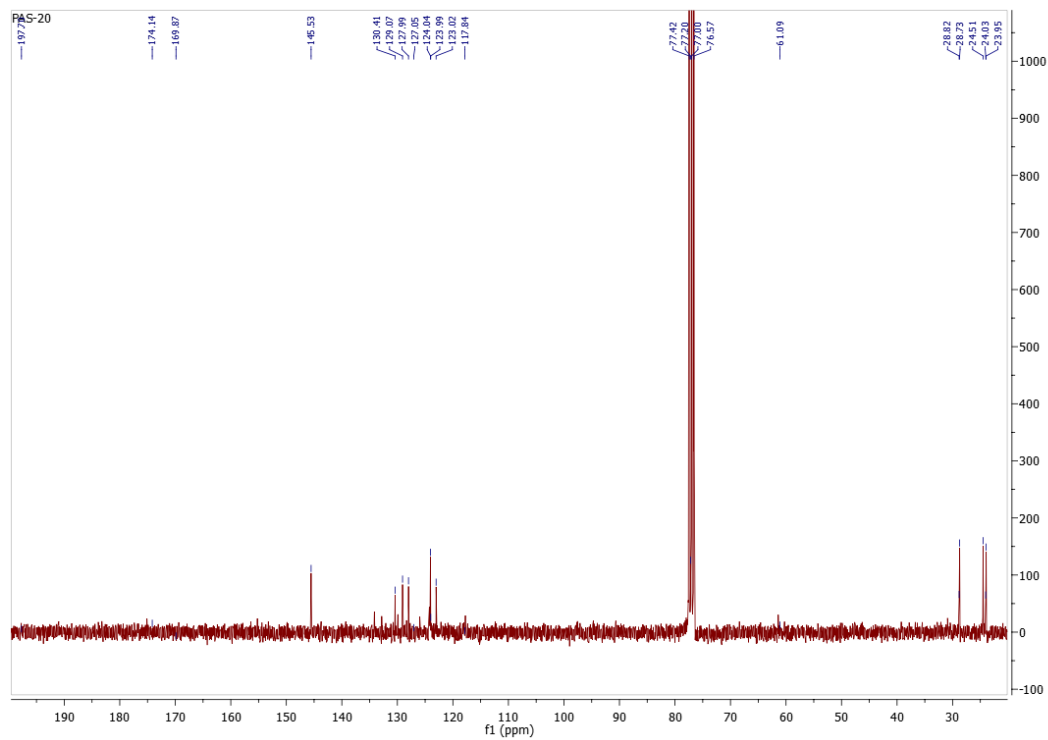

Figure S10.  $^{13}C$  NMR spectrum of  $[Au(La)(IPr)]$  (R = H) (5) in  $CDCl_3$

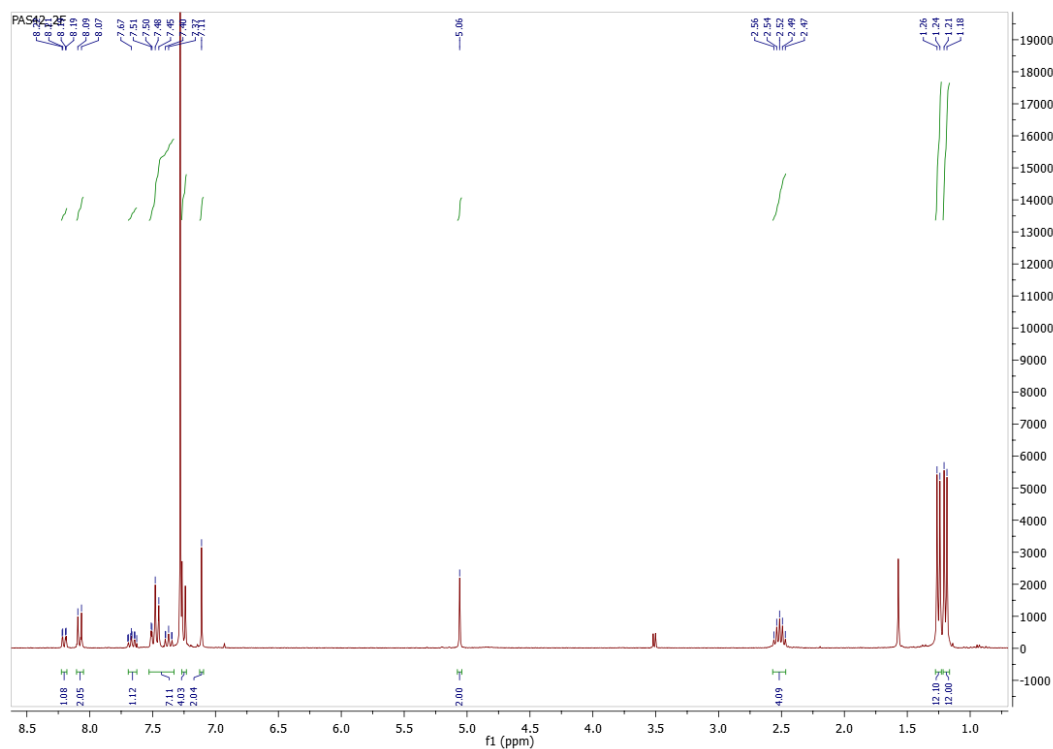

**Figure S11.**  $^1H$  NMR spectrum of  $[Au(Lb)(IPr)]$  (R = Br) (**6**) in  $CDCl_3$

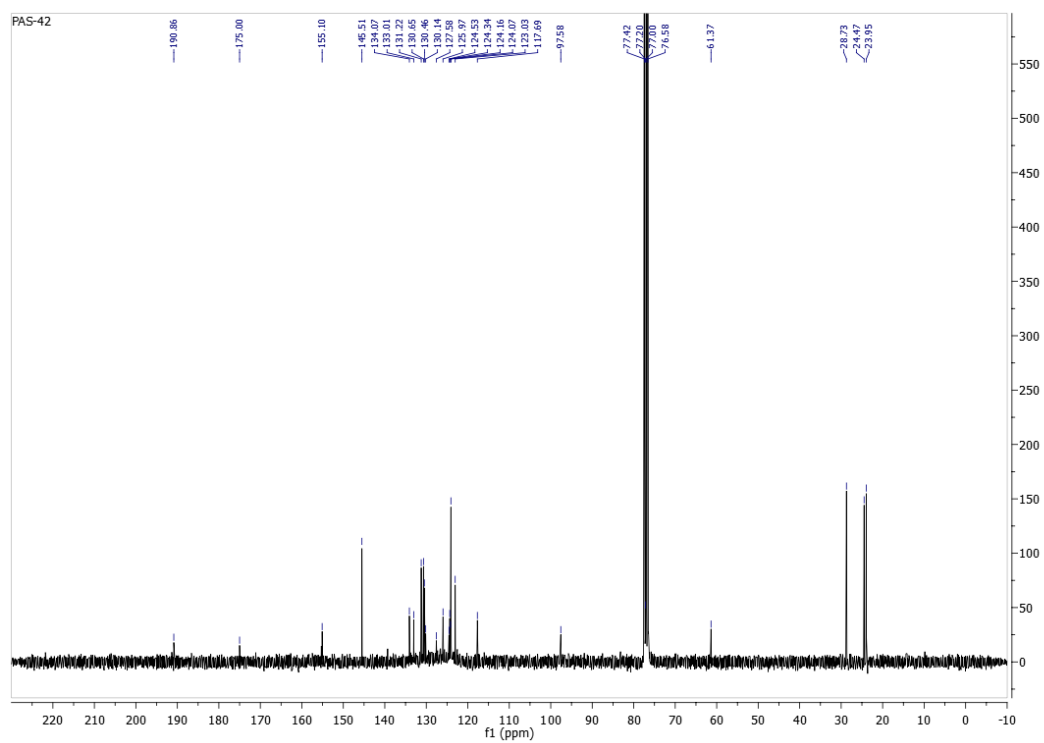

**Figure S12.**  $^{13}C\{^1H\}$  NMR spectrum of  $[Au(Lb)(IPr)]$  (R = Br) (**6**) in  $CDCl_3$

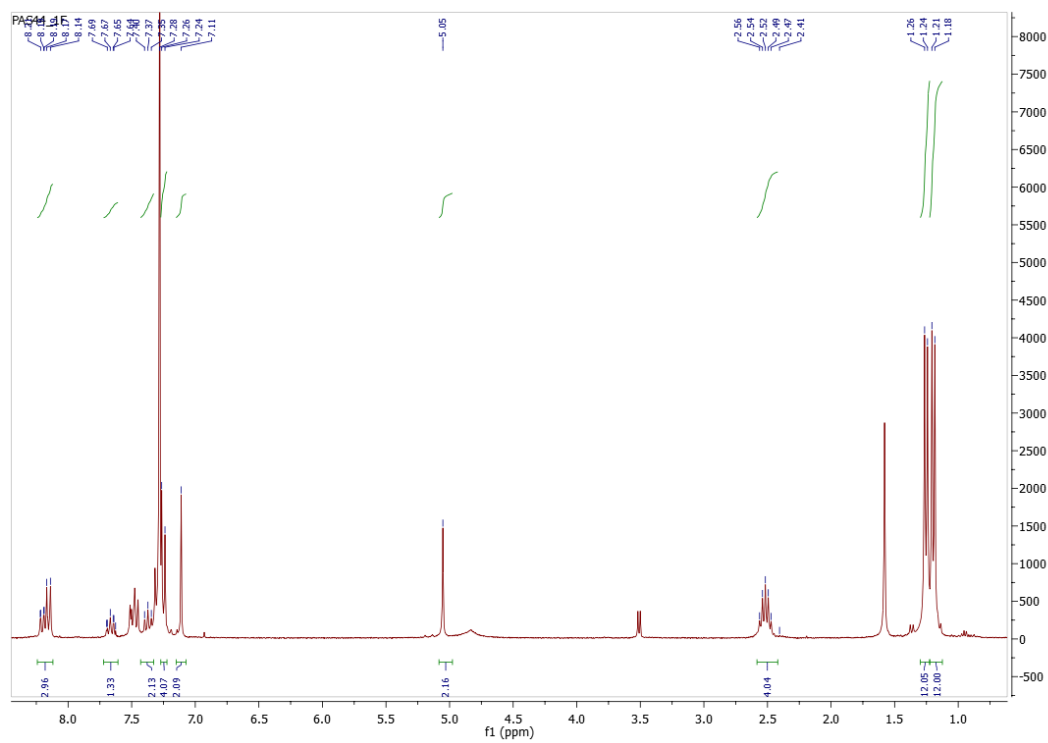

Figure S13.  $^1H$  NMR spectrum of  $[Au(Lc)(IPr)]$  (R = Cl) (**7**) in  $CDCl_3$

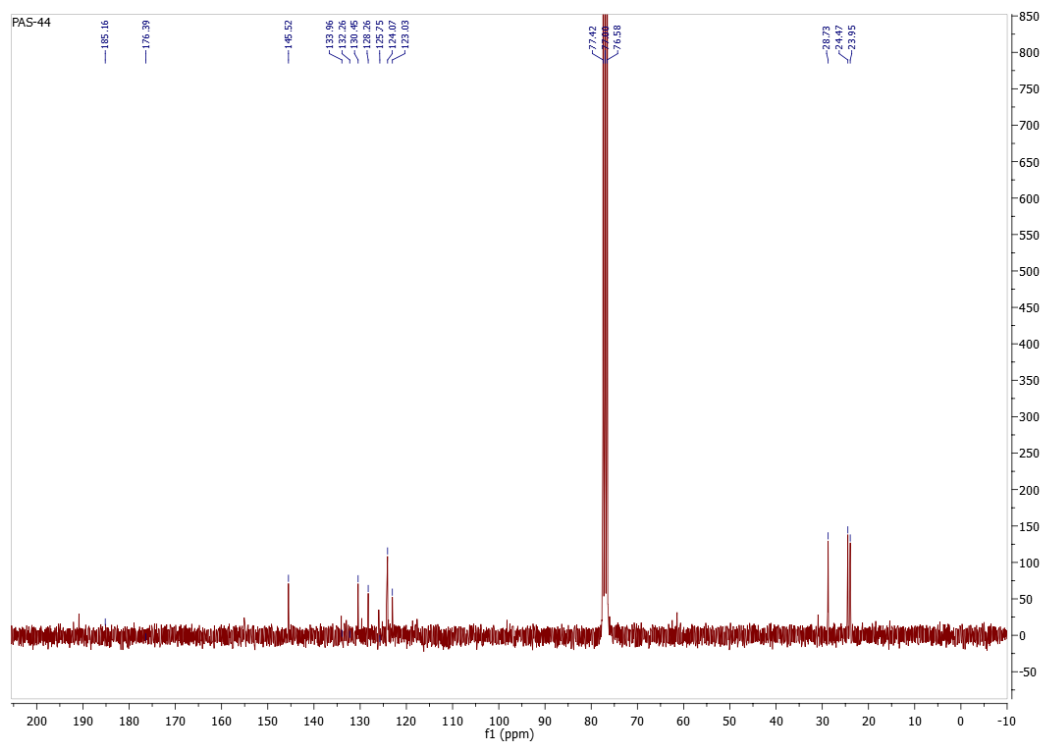

Figure S14.  $^{13}C\{^1H\}$  NMR spectrum of  $[Au(Lc)(IPr)]$  (R = Cl) (**7**) in  $CDCl_3$



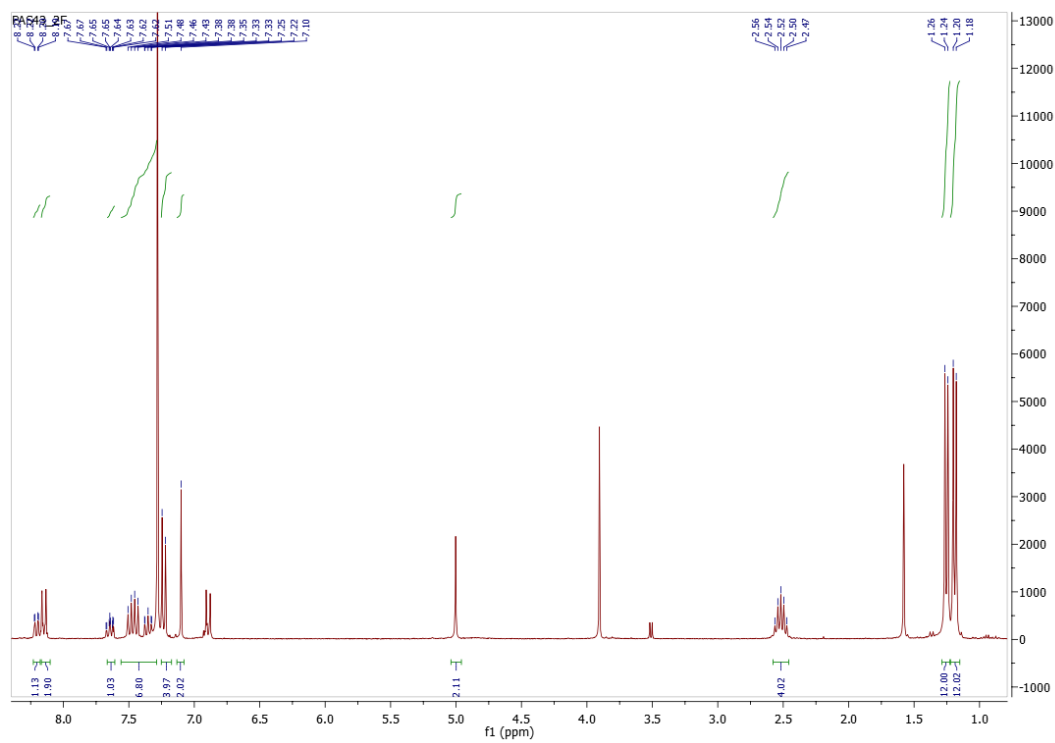

Figure S15.  $^1H$  NMR spectrum of  $[Au(Ld)(IPr)]$  (R = OMe) (**8**) in  $CDCl_3$

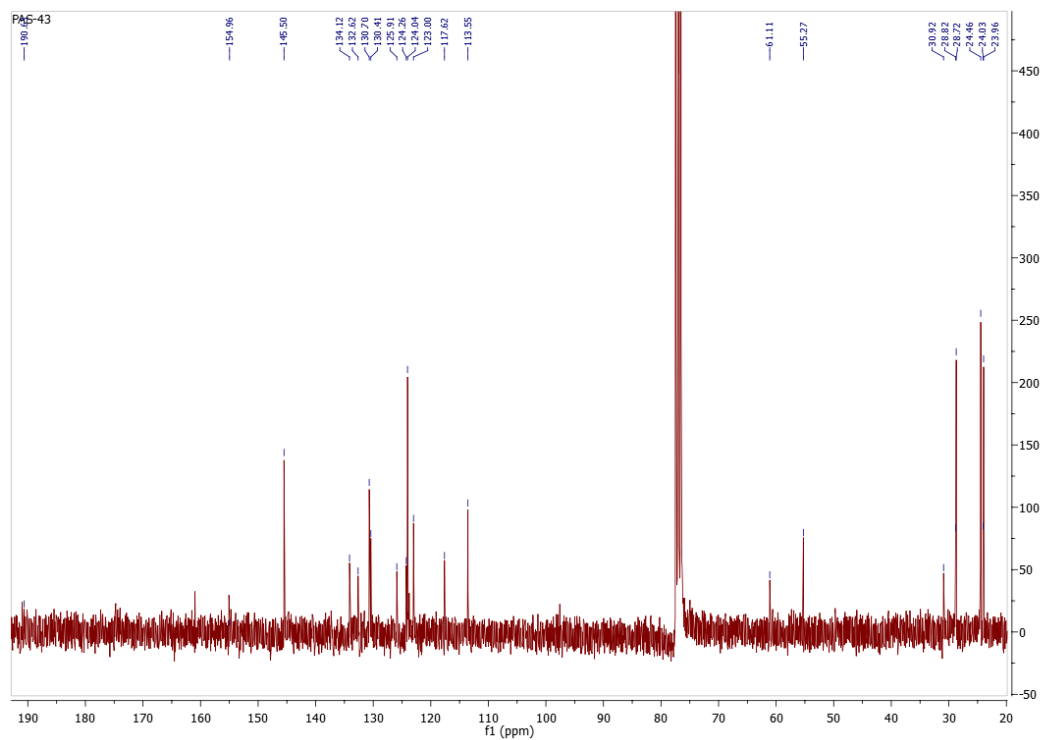

Figure S16.  $^{13}C\{^1H\}$  NMR spectrum of  $[Au(Ld)(IPr)]$  (R = OMe) (**8**) in  $CDCl_3$

**Figure S17.** UV-Vis spectra of gold complexes recorded at different times for 24 h to test their stability under physiological conditions. [complex] =  $3 \cdot 10^{-5}$  M diluted in PBS at 37 °C.

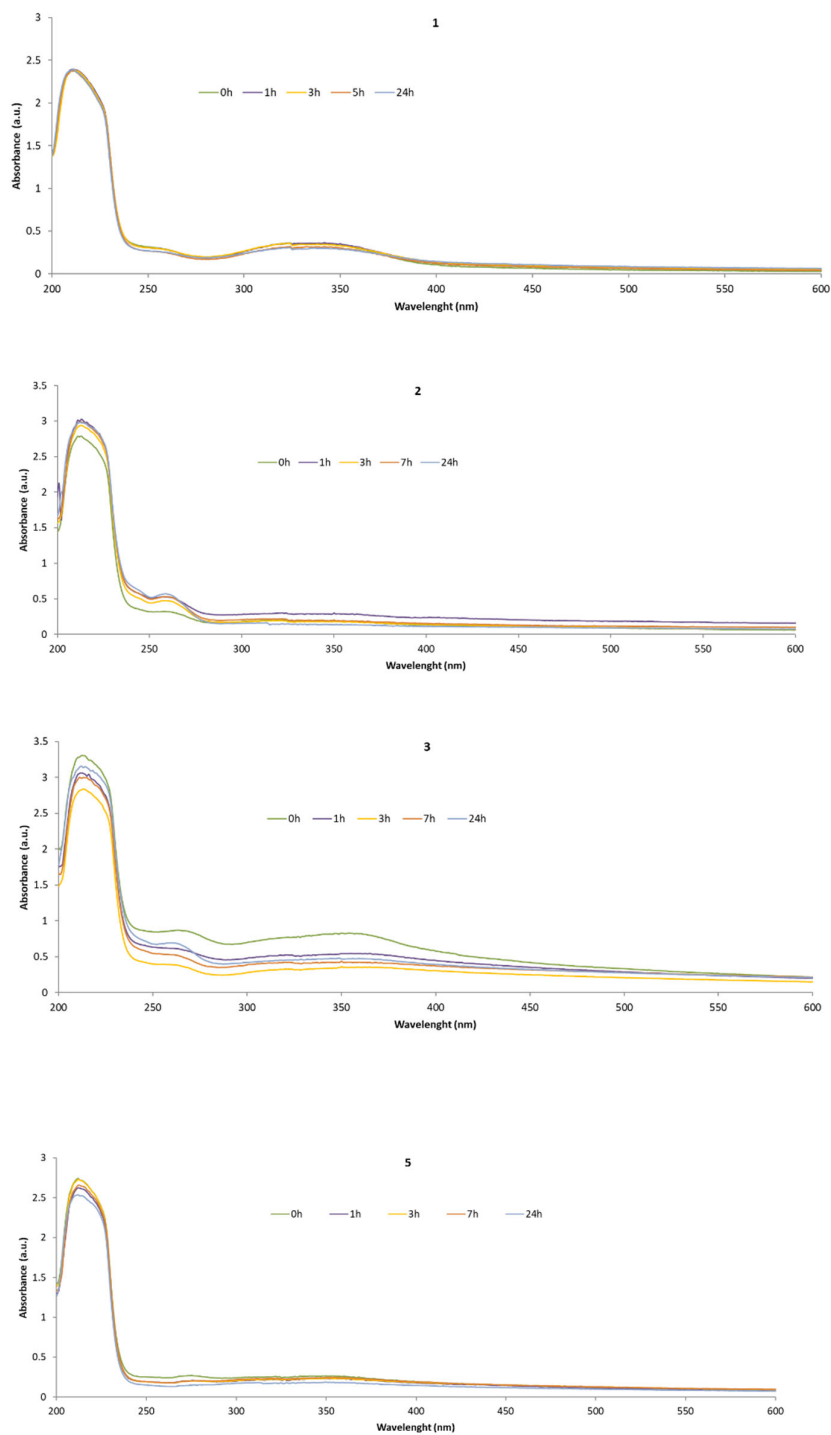

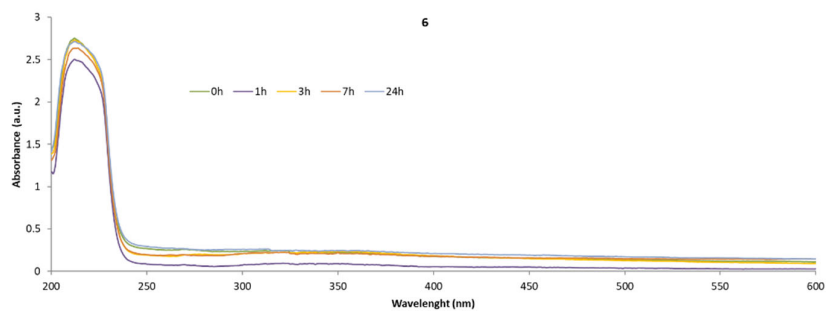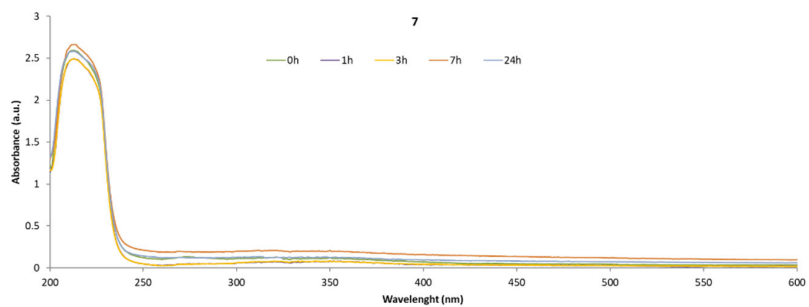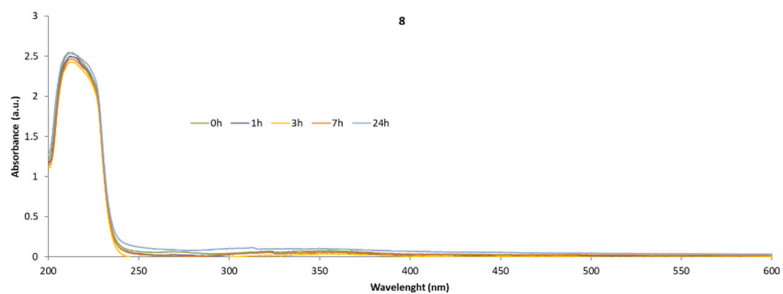

Supplement: s1 [file s1]
